# Supplementary material
Source: MDPI journal article supplement (https://www.mdpi.com/2073-4344/13/2/418)
Supplement: s1 [file s1]

# Dual Metal Site Fe Single Atom Catalyst with Improved Stability in Acidic Conditions

Yuehua Wang <sup>1,†</sup>, Shuang Li <sup>2,†</sup>, Rui Xu <sup>2,†</sup>, Junpeng Chen <sup>2</sup>, Yifan Hao <sup>2</sup>, Ke Li <sup>2</sup>, Yan Li <sup>2</sup>, Yimeng Li <sup>1,\*</sup>, and Jing Wang <sup>1,2,\*</sup>

<sup>1</sup> State Key Laboratory of Metastable Materials Science and Technology, Yanshan University, Qinhuangdao 066004, China

<sup>2</sup> Hebei Key Laboratory of Heavy Metal Deep-Remediation in Water and Resource Reuse, School of Environmental and Chemistry Engineering, Yanshan University, Qinhuangdao 066004, China

\* Correspondence: liyingmei@ysu.edu.cn (Y.L.); jwang6027@ysu.edu.cn (J.W.)

† These authors contributed equally to this work.

**Table S1.** Structural evolution of electrochemical ORR for the designed catalysts, top view and side view.

| DMSC                    | CATA                                                                                | *O <sub>2</sub>                                                                     | *OOH                                                                                | *O                                                                                    | *OH                                                                                   |
|-------------------------|-------------------------------------------------------------------------------------|-------------------------------------------------------------------------------------|-------------------------------------------------------------------------------------|---------------------------------------------------------------------------------------|---------------------------------------------------------------------------------------|
| FeCrN <sub>6</sub> (I)  | 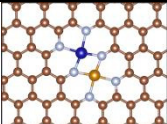  |   |   |   |   |
| FeCrN <sub>6</sub> (II) |  |  |  |  |  |
| FeCuN <sub>6</sub> (I)  |  |  |  |  |  |
| FeCuN <sub>6</sub> (II) |  |  |  |  |  |
| FeMnN <sub>6</sub> (I)  |  |  |  |  |  |

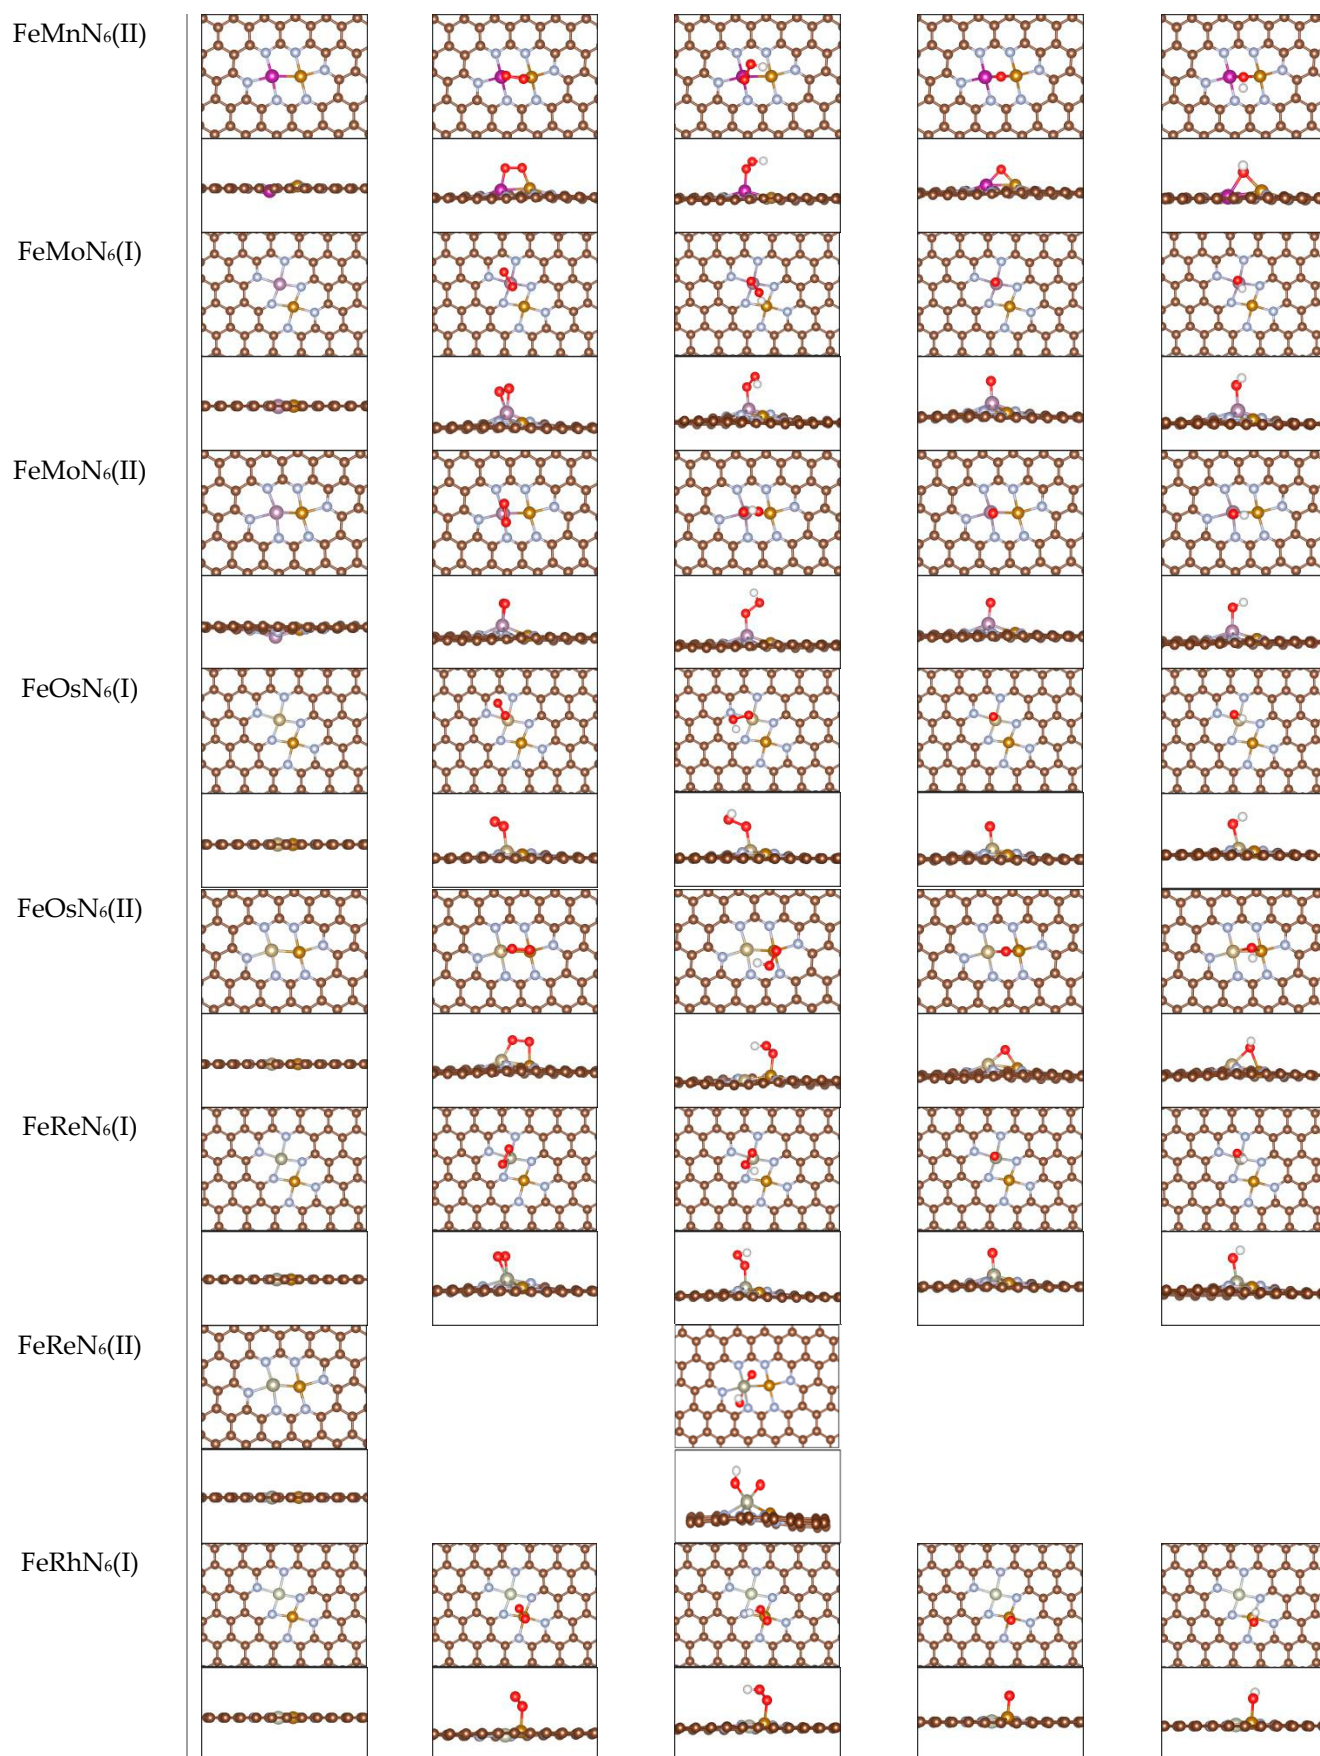



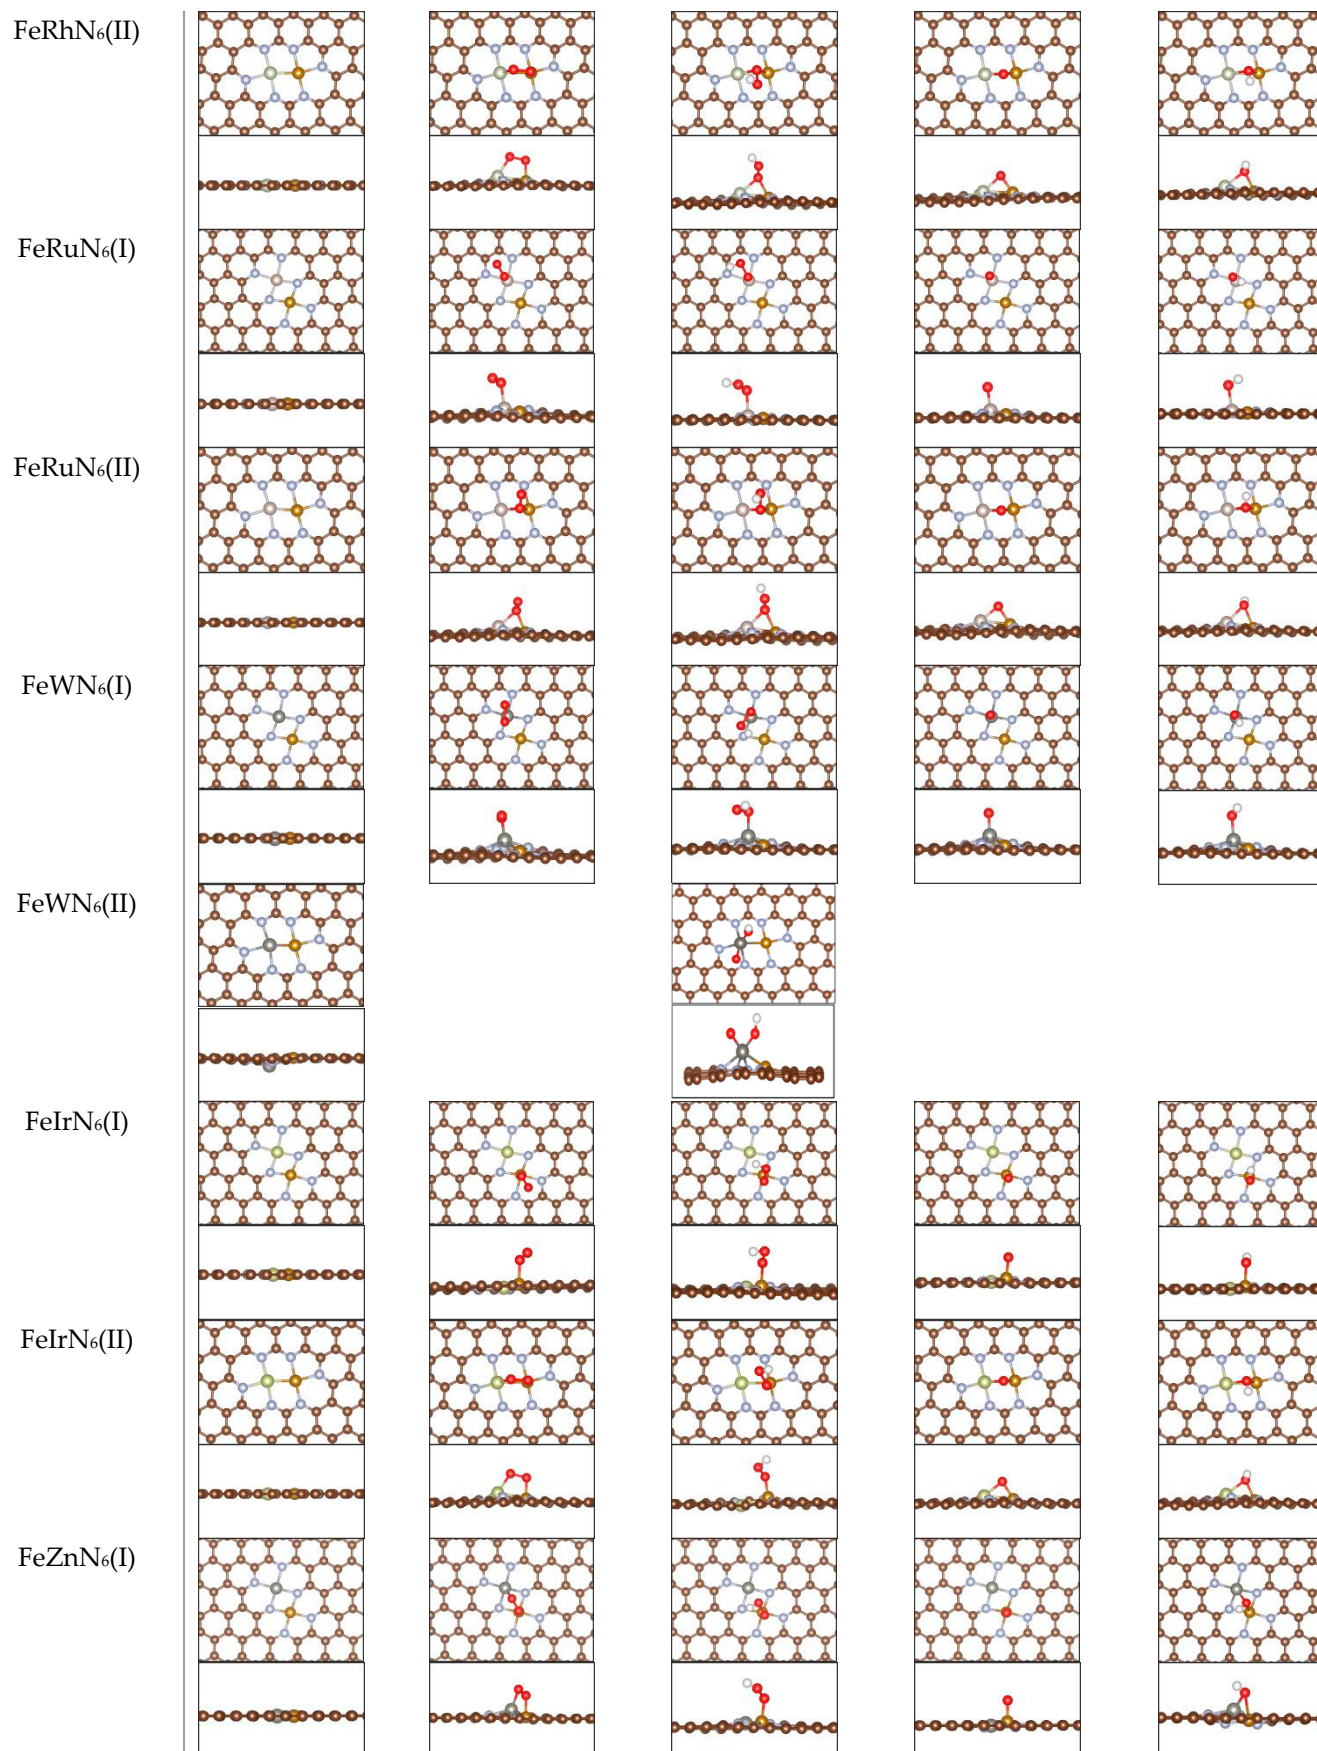

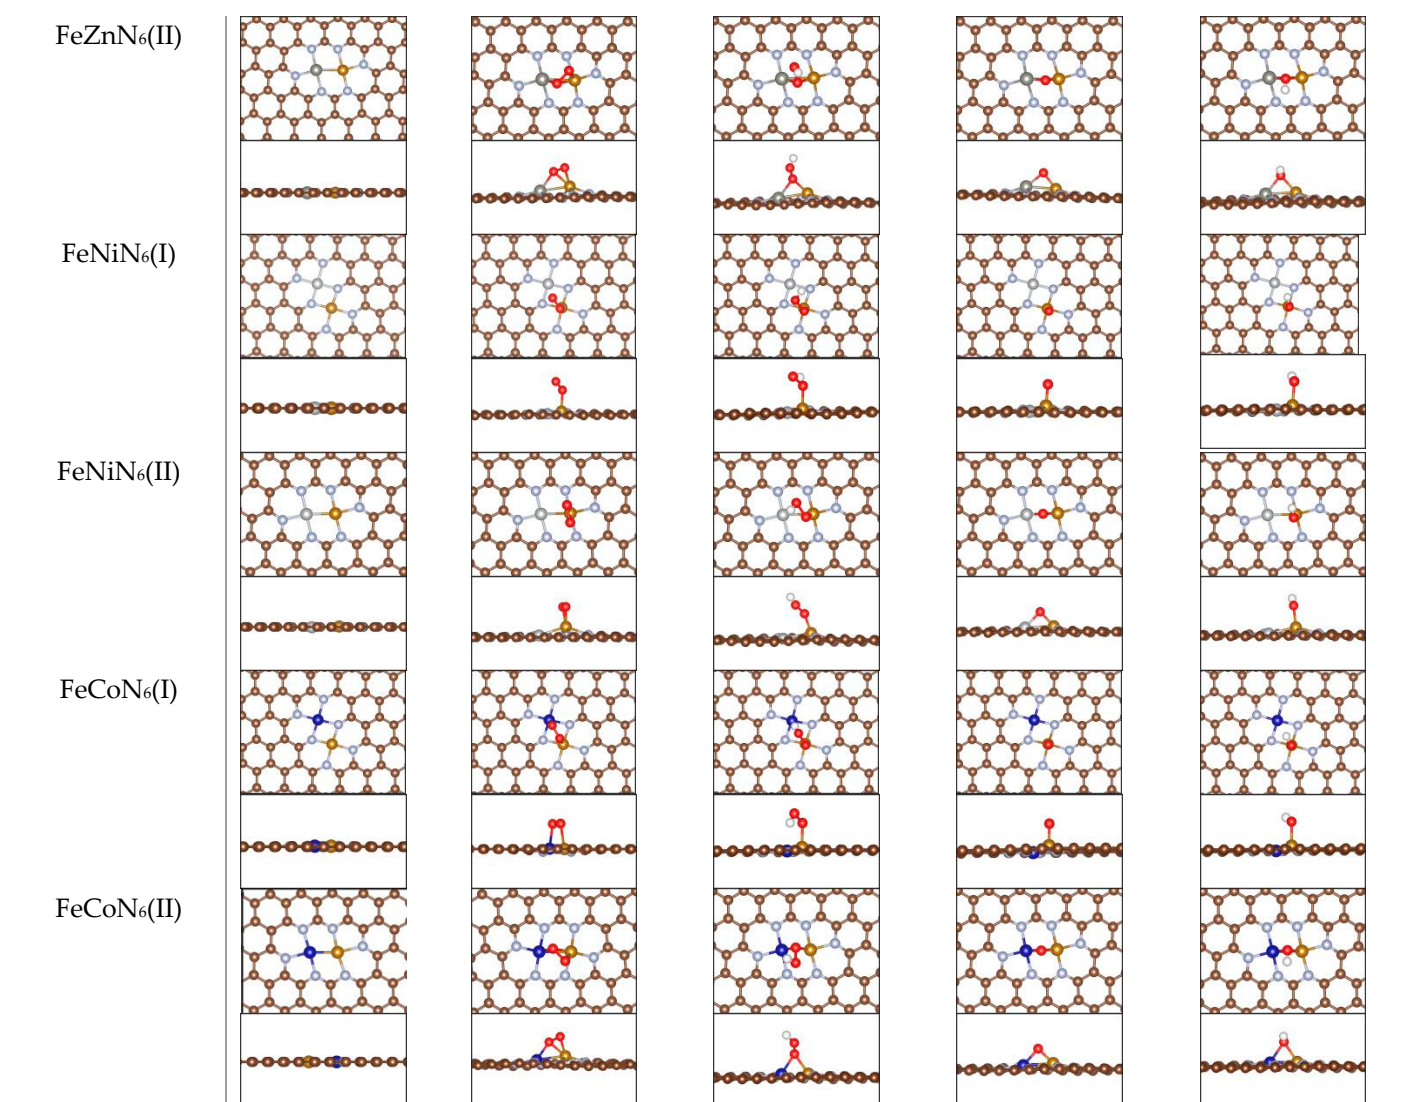

**Table S2.** The bond lengths of M1-M2 and \*O<sub>2</sub>. Adsorption energies of the O<sub>2</sub> with DMSCs.

| DMSC                    | d <sub>M1-M2</sub> (Å) | d <sub>M1-M2</sub> (Å) *O <sub>2</sub> | *O <sub>2</sub> (Å) | ΔE <sub>ads</sub> (eV) |
|-------------------------|------------------------|----------------------------------------|---------------------|------------------------|
| FeCrN <sub>6</sub> (I)  | 2.26                   | 2.27                                   | 1.40                | −2.11                  |
| FeCrN <sub>6</sub> (II) | 2.41                   | 2.57                                   | 1.49                | −3.38                  |
| FeCuN <sub>6</sub> (I)  | 2.47                   | 2.50                                   | 1.30                | −0.89                  |
| FeCuN <sub>6</sub> (II) | 2.41                   | 2.49                                   | 1.38                | −1.67                  |
| FeMnN <sub>6</sub> (I)  | 2.28                   | 2.26                                   | 1.40                | −1.08                  |
| FeMnN <sub>6</sub> (II) | 2.35                   | 2.39                                   | 1.43                | −2.80                  |
| FeMoN <sub>6</sub> (I)  | 2.31                   | 2.45                                   | 1.49                | −3.3                   |
| FeMoN <sub>6</sub> (II) | 2.11                   | 2.27                                   | 1.46                | −3.60                  |
| FeOsN <sub>6</sub> (I)  | 2.31                   | 2.33                                   | 1.32                | −0.78                  |
| FeOsN <sub>6</sub> (II) | 2.19                   | 2.36                                   | 1.40                | −2.27                  |
| FeReN <sub>6</sub> (I)  | 2.31                   | 2.40                                   | 1.48                | −2.18                  |
| FeRhN <sub>6</sub> (I)  | 2.33                   | 2.34                                   | 1.29                | −0.67                  |
| FeRhN <sub>6</sub> (II) | 2.25                   | 2.48                                   | 1.40                | −1.60                  |
| FeRuN <sub>6</sub> (I)  | 2.30                   | 2.33                                   | 1.30                | −0.82                  |
| FeRuN <sub>6</sub> (II) | 2.17                   | 2.30                                   | 1.34                | −1.60                  |
| FeWN <sub>6</sub> (I)   | 2.32                   | 1.92                                   | 1.51                | −3.81                  |
| FeIrN <sub>6</sub> (I)  | 2.33                   | 2.35                                   | 1.29                | −0.78                  |
| FeIrN <sub>6</sub> (II) | 2.26                   | 2.48                                   | 1.43                | −1.73                  |
| FeZnN <sub>6</sub> (I)  | 2.54                   | 2.55                                   | 1.36                | −1.47                  |
| FeZnN <sub>6</sub> (II) | 2.41                   | 2.62                                   | 1.44                | −2.80                  |
| FeNiN <sub>6</sub> (I)  | 2.48                   | 2.48                                   | 1.29                | −0.79                  |
| FeNiN <sub>6</sub> (II) | 2.30                   | 2.43                                   | 1.39                | −1.59                  |
| FeCoN <sub>6</sub> (I)  | 2.48                   | 2.46                                   | 1.29                | −0.62                  |
| FeCoN <sub>6</sub> (II) | 2.18                   | 2.53                                   | 1.38                | −1.60                  |

**Table S3.** Bader charge (in units of e). Q(Fe), Q(Other) refer to the charge on Fe, other transition metals to DMSCs.

| DMSC     | Q(Fe) | Q(Fe*O <sub>2</sub> ) | DMSC      | Q(Fe) | Q(Fe*O <sub>2</sub> ) |
|----------|-------|-----------------------|-----------|-------|-----------------------|
| Fe/Cr(I) | −1.11 | −1.27                 | Fe/Cr(II) | −0.71 | −1.04                 |
| Fe/Cu(I) | −1.21 | −1.37                 | Fe/Cu(II) | −0.97 | −1.23                 |
| Fe/Mn(I) | −1.04 | −1.28                 | Fe/Mn(II) | −0.74 | −1.08                 |
| Fe/Mo(I) | −1.01 | −1.02                 | Fe/Mo(II) | −0.72 | −0.85                 |
| Fe/Os(I) | −1.03 | −1.02                 | Fe/Os(II) | −0.91 | −1.11                 |
| Fe/Re(I) | −1.05 | −1.02                 | --        | --    | --                    |
| Fe/Rh(I) | −1.10 | −1.29                 | Fe/Rh(II) | −1.01 | −1.18                 |
| Fe/Ru(I) | −0.95 | −1.03                 | Fe/Ru(II) | −0.84 | −1.14                 |
| Fe/W(I)  | −0.95 | −1.02                 | --        | --    | --                    |
| Fe/Ir(I) | −1.07 | −1.28                 | Fe/Ir(II) | −0.90 | −1.16                 |
| Fe/Zn(I) | −1.46 | −1.60                 | Fe/Zn(II) | −0.74 | −1.20                 |
| Fe/Ni(I) | −1.46 | −1.58                 | Fe/Ni(II) | −0.90 | −1.18                 |
| Fe/Co(I) | −1.05 | −1.35                 | Fe/Co(II) | −2.35 | −1.10                 |

**Table S4.** Adsorption free energies ( $\Delta G^{\text{ads}}$ , eV) of the key ORR intermediate species associated with DMSCs.

| DMSC                    | $\Delta G^{\text{*OOH}}$ | $\Delta G^{\text{*O}}$ | $\Delta G^{\text{*OH}}$ | $\eta_{\text{ORR}}$ |
|-------------------------|--------------------------|------------------------|-------------------------|---------------------|
| FeCrN <sub>6</sub> (I)  | 2.86                     | −0.20                  | −0.27                   | 1.50                |
| FeCrN <sub>6</sub> (II) | −0.75                    | −1.42                  | −1.24                   | 2.47                |
| FeCuN <sub>6</sub> (I)  | 3.82                     | 1.73                   | 0.75                    | 0.48                |
| FeCuN <sub>6</sub> (II) | 2.95                     | 0.67                   | −0.12                   | 1.35                |
| FeMnN <sub>6</sub> (I)  | 3.70                     | 1.50                   | 0.69                    | 0.54                |
| FeMnN <sub>6</sub> (II) | 2.82                     | −0.86                  | −0.94                   | 2.17                |
| FeMoN <sub>6</sub> (I)  | 1.86                     | −1.69                  | −1.32                   | 2.55                |
| FeMoN <sub>6</sub> (II) | 3.30                     | −1.50                  | −1.05                   | 2.28                |
| FeOsN <sub>6</sub> (I)  | 3.78                     | 1.40                   | 0.74                    | 0.57                |
| FeOsN <sub>6</sub> (II) | 3.36                     | −0.24                  | −0.34                   | 1.57                |
| FeReN <sub>6</sub> (I)  | 2.89                     | −0.53                  | −0.25                   | 1.51                |
| FeRhN <sub>6</sub> (I)  | 3.98                     | 2.31                   | 1.02                    | 0.30                |
| FeRhN <sub>6</sub> (II) | 3.19                     | 0.46                   | 0.28                    | 1.05                |
| FeRuN <sub>6</sub> (I)  | 3.84                     | 2.01                   | 0.81                    | 0.42                |
| FeRuN <sub>6</sub> (II) | 2.85                     | 0.06                   | −0.14                   | 1.37                |
| FeWN <sub>6</sub> (I)   | 6.26                     | −2.09                  | −1.70                   | 2.57                |
| FeIrN <sub>6</sub> (I)  | 3.95                     | 2.41                   | 1.03                    | 0.26                |
| FeIrN <sub>6</sub> (II) | 3.53                     | 0.34                   | 0.23                    | 1.12                |
| FeZnN <sub>6</sub> (I)  | 3.96                     | 2.05                   | 0.82                    | 0.41                |
| FeZnN <sub>6</sub> (II) | 2.28                     | −0.44                  | −0.88                   | 2.11                |
| FeNiN <sub>6</sub> (I)  | 3.52                     | 3.11                   | 0.53                    | 0.70                |
| FeNiN <sub>6</sub> (II) | 3.18                     | 0.49                   | 0.08                    | 1.15                |
| FeCoN <sub>6</sub> (I)  | 4.03                     | 2.23                   | 1.07                    | 0.34                |
| FeCoN <sub>6</sub> (II) | 3.65                     | 0.23                   | 0.26                    | 1.26                |

**Table S5.** O-O bond distance in \*O<sub>2</sub>, theoretical overpotential, half-wave potential ( $E_{1/2}$ ) and onset potential ( $E_{\text{onset}}$ ) in literature and this work.

| catalysts | $E_{1/2}$ | $E_{\text{onset}}$ | $\eta$ | d <sub>o-o</sub> | Ref.                                                      |
|-----------|-----------|--------------------|--------|------------------|-----------------------------------------------------------|
| Fe-N-C    | 0.875V    |                    | 0.79V  |                  | Energy Environ. Sci., 2022,15, 1601 [29]                  |
| Fe/Co-N-C |           |                    |        | 1.40Å            | J. Am. Chem. Soc. 2017, 139, 17281 [26]                   |
| Fe/Cu-N-C |           | 0.92V              | 0.38V  | 1.39Å            | Adv. Funct. Mater. 2021, 31, 2006533 [22]                 |
| Fe/Ni-N-C | 0.861V    | 1.005V             |        |                  | Applied Catalysis B: Environmental 2021, 285, 119778 [28] |
| Fe/Zn-N-C | 0.906V    |                    | 0.41V  |                  | Energy Environ. Sci., 2022,15, 1601 [29]                  |
| Co/Ni-N-C | 0.76V     | --                 | 0.35V  |                  | Adv. Mater. 2019, 31, 1905622 [46]                        |
| Fe/Co-N-C |           |                    | 0.34V  | 1.29Å            |                                                           |
| Fe/Ir-N-C |           |                    | 0.26V  | 1.29Å            |                                                           |
| Fe/Ru-N-C |           |                    | 0.42V  | 1.40Å            | This work                                                 |
| Fe/Rh-N-C |           |                    | 0.30V  | 1.29Å            |                                                           |
| Fe/Os-N-C |           |                    | 0.57V  | 1.32Å            |                                                           |



**Table S6.** Structural evolution of electrochemical ORR for DMSCs with \*H and 2\*H, top view and side view.

| DMSC        | CATA                                                                                | *O <sub>2</sub>                                                                     | *OOH                                                                                | *O                                                                                    | *OH                                                                                   |
|-------------|-------------------------------------------------------------------------------------|-------------------------------------------------------------------------------------|-------------------------------------------------------------------------------------|---------------------------------------------------------------------------------------|---------------------------------------------------------------------------------------|
| Fe/Ru(I)*H  | 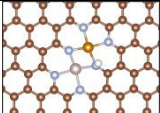   |    |    |    |    |
|             |    |    |    |    |    |
| Fe/Ru(I)*2H |    |    |    |    |    |
|             |    |    |    |    |    |
| Fe/Rh(I)*H  |    |    |    |    |    |
|             |    |    |    |    |    |
| Fe/Rh(I)*2H |  |  |  |  |  |
|             |  |  |  |  |  |
| Fe/Os(I)*H  |  |  |  |  |  |
|             |  |  |  |  |  |
| Fe/Os(I)*2H |  |  |  |  |  |
|             |  |  |  |  |  |
| Fe/Ir(I)*H  |  |  |  |  |  |
|             |  |  |  |  |  |
| Fe/Ir(I)*2H |  |  |  |  |  |
|             |  |  |  |  |  |

**Table S7.** Adsorption free energies ( $\Delta G^{\text{ads}}$ , eV) of the key ORR intermediate species for DMSCs with \*H and 2\*H.

| DMSC         | *OOH | *O   | *OH  | $\eta$ |
|--------------|------|------|------|--------|
| Fe/Ru(I)     | 3.84 | 2.01 | 0.81 | 0.42   |
| Fe/Ru(I)*H   | 3.87 | 1.83 | 0.95 | 0.35   |
| Fe/Ru(I) 2*H | 3.53 | 1.37 | 0.33 | 0.90   |
| Fe/Rh(I)     | 3.98 | 2.31 | 1.02 | 0.30   |
| Fe/Rh(I)*H   | 3.76 | 1.59 | 0.68 | 0.54   |
| Fe/Rh(I)2*H  | 3.28 | 1.30 | 0.02 | 1.21   |
| Fe/Os(I)     | 3.78 | 1.40 | 0.74 | 0.57   |
| Fe/Os(I)*H   | 3.79 | 1.73 | 0.88 | 0.38   |
| Fe/Os(I)2*H  | 3.47 | 1.42 | 0.04 | 1.19   |
| Fe/Ir(I)     | 3.95 | 2.41 | 1.03 | 0.26   |
| Fe/Ir(I)*H   | 3.79 | 1.64 | 0.71 | 0.52   |
| Fe/Ir(I)2*H  | 3.25 | 1.28 | 0.08 | 1.15   |

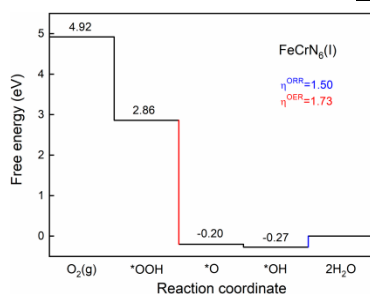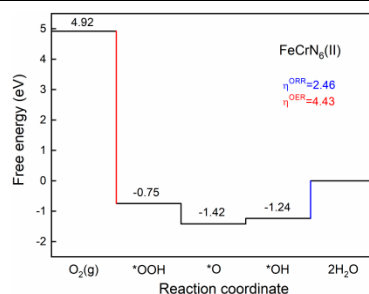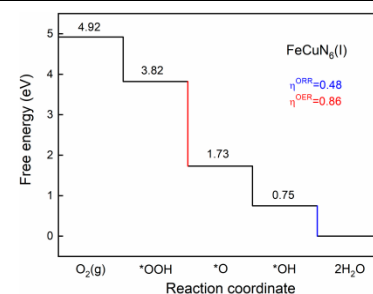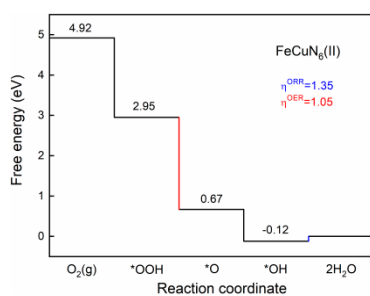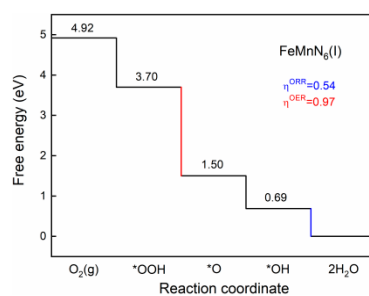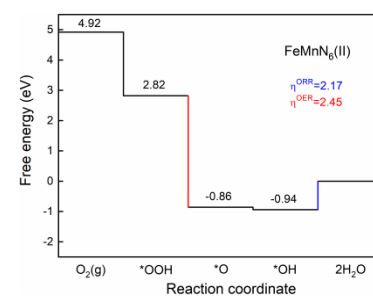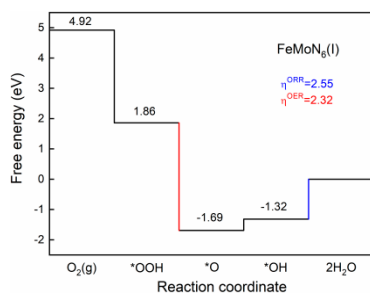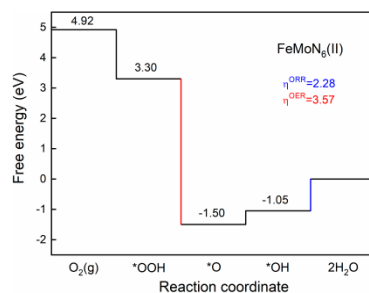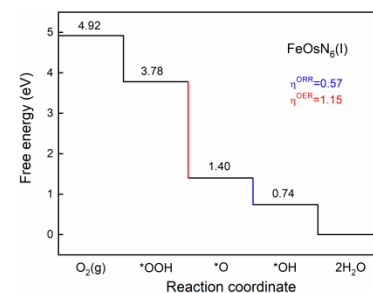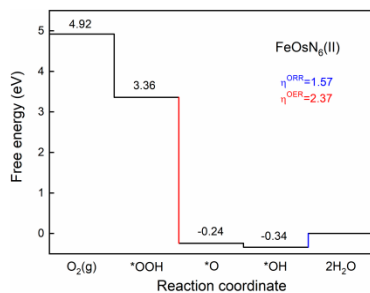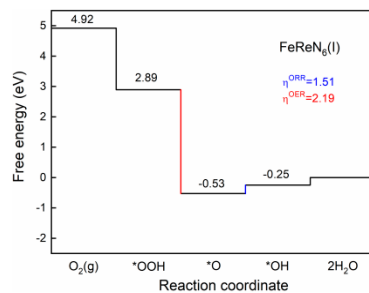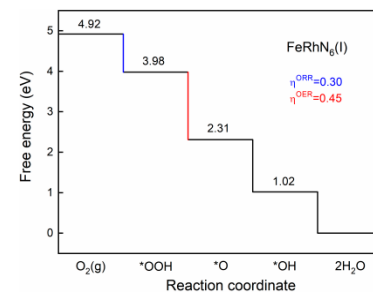



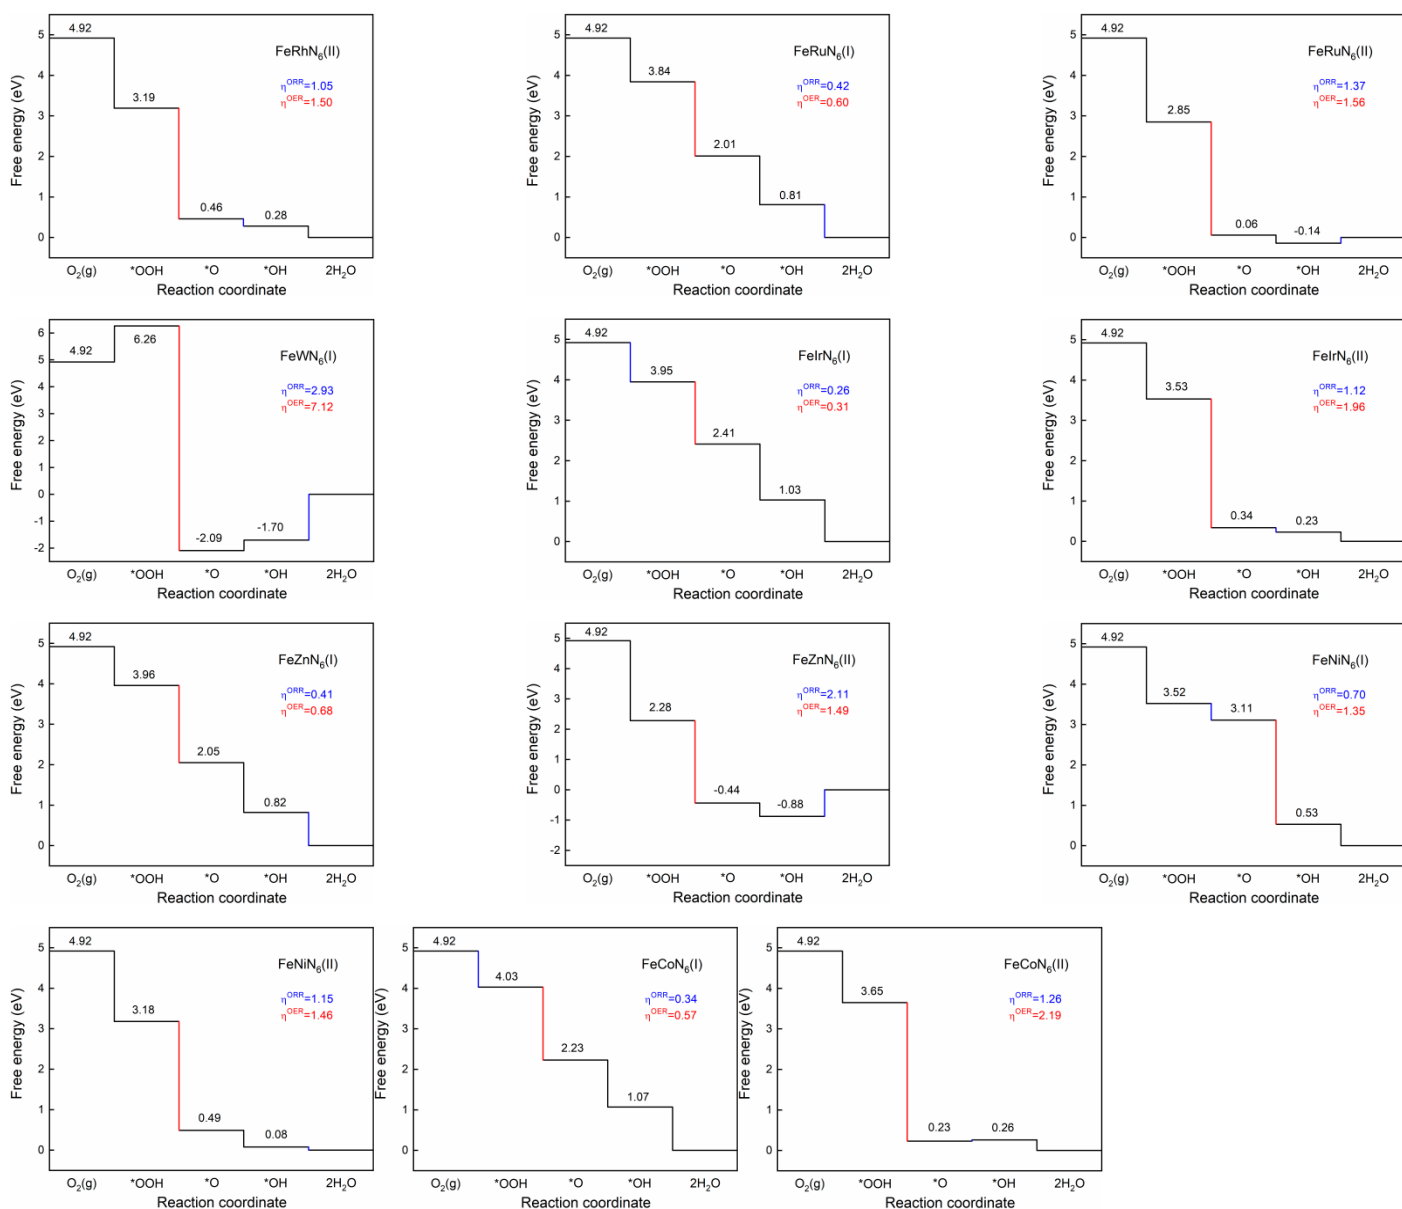

Figure S1. Gibbs free energy profiles for the designed catalysts.

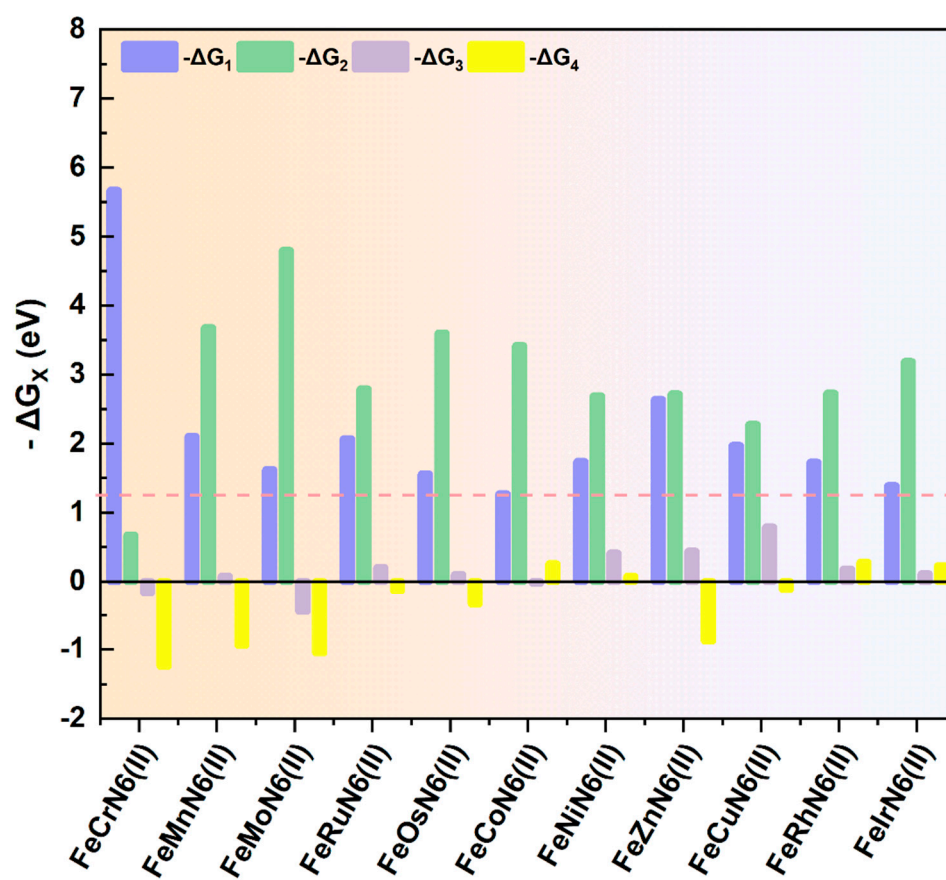

**Figure S2.** Free energy diagram for FeTMN<sub>6</sub>(II) (TM = Cr, Mn, Mo, Ru, W, Re, Os, Co, Ni, CuRe, Os, Co, Ni, Cu, Zn, Rh and Ir) moieties.

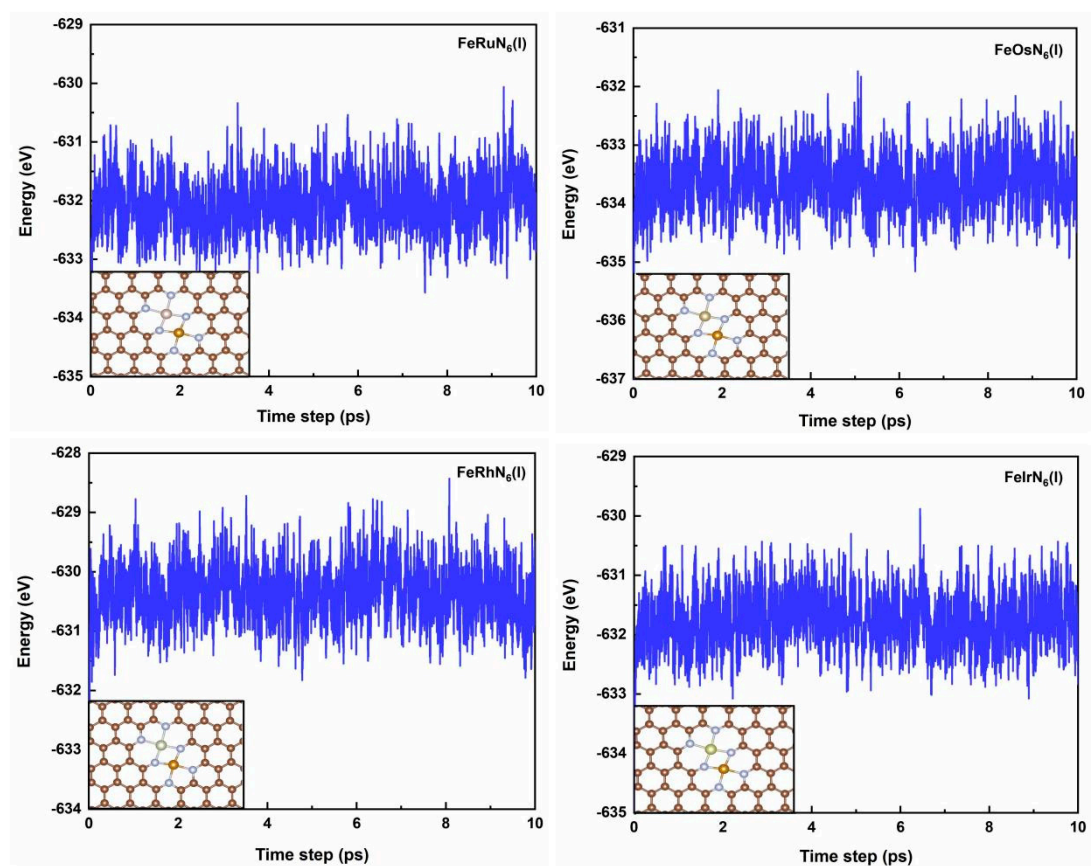

Figure S3. Energy evolution at 300 K for FeRuN<sub>6</sub>(I), FeOsN<sub>6</sub>(I), FeRhN<sub>6</sub>(I), and FeIrN<sub>6</sub>(I).
